# Supplementary material for: Human intelectin-1 (ITLN1) genetic variation and intestinal expression
Source: PubMed Central journal article supplement (PMC8213764; doi:10.1038/s41598-021-92198-9), 2021-06-18
Supplement: 41598_2021_92198_MOESM1_ESM.pdf [file 41598_2021_92198_MOESM1_ESM.pdf]

## **Human Intelectin-1 (ITLN1) Genetic Variation and Intestinal Expression**

Eric B. Nonnecke\*, Patricia A. Castillo, Amanda E. Dugan, Faisal Almalki, Mark A. Underwood, Carol A. De La Motte, Weirong Yuan, Wuyuan Lu, Bo Shen, Malin E. V. Johansson, Laura L. Kiessling, Edward J. Hollox, Bo Lönnerdal, and Charles L. Bevins\*

**Supplemental Figure 1.** *ITLN1* rs2274907 allele frequencies in African and European superpopulations as outlined by the 1000 Genomes Project Phase 3.

**Supplemental Figure 2.** *ITLN1* mRNA and protein expression in gastrointestinal tissues assessed by qRT-PCR and immunohistochemistry, respectively.

**Supplemental Table 1.** *ITLN1* rs2274907 (A/T, V109D) genotype analysis in IBD surgical specimens compared to controls.

**Supplemental Table 2.** Analysis of linkage disequilibrium on Chromosome 1 centromeric to *ITLN1*.

**Supplemental Table 3.** Quantitative trait loci analysis of whole blood using SNPs at the *ITLN1* locus identified by the NHGRI-EBI GWAS Catalog and NCBI-LitVar.

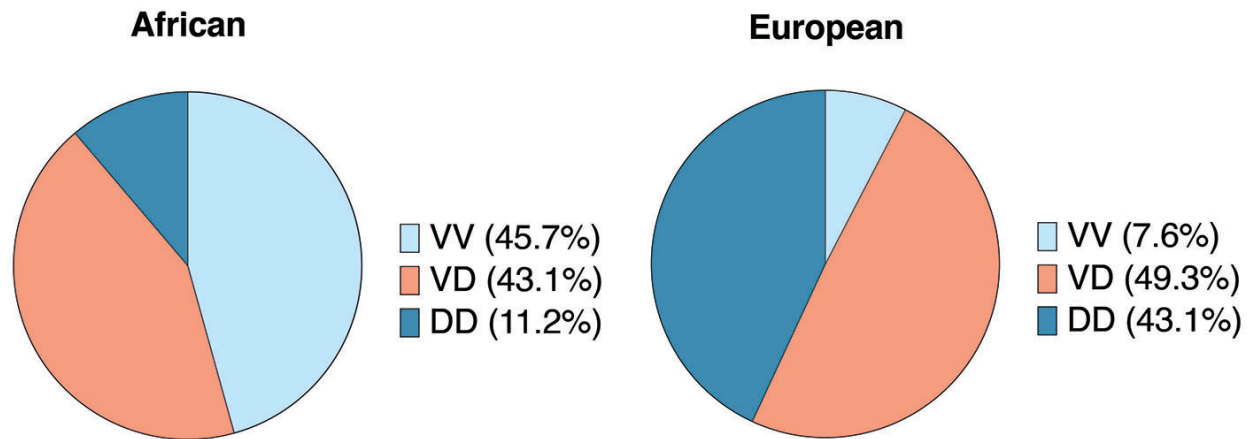

**Supplemental Figure 1:** (A) *ITLN1* rs2274907 frequency of AA (encoding VV), AT (encoding VD) and TT (encoding DD) genotypes in African and European superpopulations as outlined by the 1000 Genomes Project Phase 3 <sup>31,32</sup>.

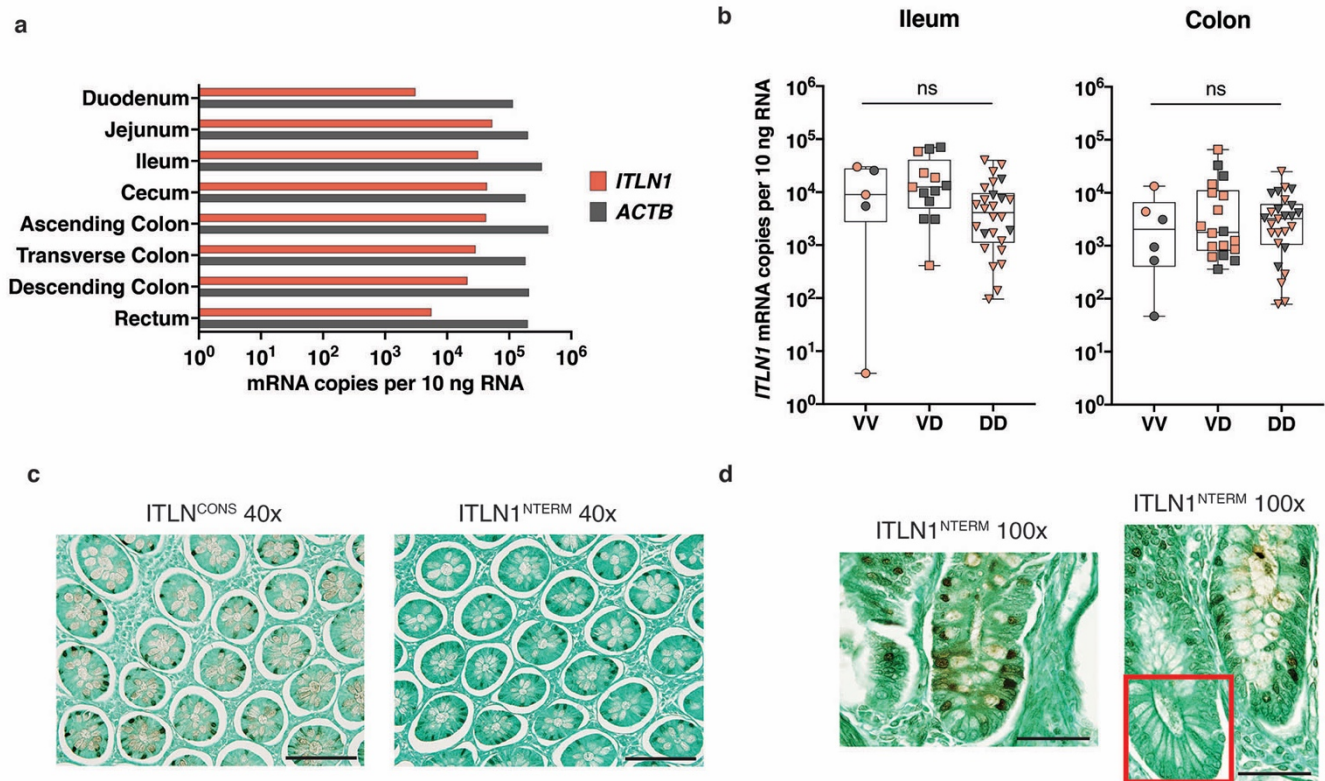

**Supplemental Figure 2:** (A) *ITLN1* and *ACTB* mRNA expression by qRT-PCR in commercially-obtained RNAs of human small intestine and colon. (B) *ITLN1* mRNA expression in ileum and colon specimens by genotype (rs2274907, V109D) in non-Crohn's disease (gray) and Crohn's disease (orange); ulcerative colitis specimens are excluded. Statistical analysis of *ITLN1* mRNA expression was performed by a Kruskal-Wallis test with Dunn's multiple comparisons. (C) Immunohistochemistry of human colon using ITLN conserved (ITLN<sup>CONS</sup>, left) and ITLN1-specific (ITLN<sup>NTERM</sup>, right) antibodies. (D) Immunohistochemistry using the ITLN<sup>NTERM</sup> antibody on human ileum demonstrating staining of goblet cells. Red box indicates collection of Paneth cells not stained with ITLN<sup>NTERM</sup> antibody, but identified with the ITLN<sup>CONS</sup> and ITLN<sup>NTERM</sup> antibodies (as in Figure 2G). Scale bars: 40x (100  $\mu$ m) and 100x (50  $\mu$ m).

**Supplemental Table 1: ITLN1 rs2274907 (A/T, V109D) genotype analysis in IBD surgical specimens compared to controls.**

|                              | <i>VV</i> | <i>VD</i> | <i>DD</i> | <i>[AF, D]</i> | <i>p value</i>                                                 |
|------------------------------|-----------|-----------|-----------|----------------|----------------------------------------------------------------|
| <i>Non-CD/UC</i>             | 3 (4)     | 12 (2)    | 14 (1)    | [68.9]         |                                                                |
| <i>CD Ileum</i>              | 3         | 5         | 24        | [82.8]         | <b>p = 0.09</b><br><b>OR: 2.17</b><br><b>CI: [0.95 – 4.95]</b> |
| <i>CD Colon</i>              | 3         | 13 (1)    | 19        | [72.8]         | <b>p = 0.697</b>                                               |
| <i>UC Colon</i>              | 0         | 17        | 13        | [71.7]         | <b>p = 0.841</b>                                               |
| <i>Non-CD/UC vs CD (All)</i> |           |           |           |                | <b>p = 0.21</b><br><b>OR: 1.56</b><br><b>CI: [0.75 - 3.03]</b> |

Due to major differences of allele frequency of African superpopulations that could artifactually influence statistical comparisons between IBD and non-IBD subgroups, the n = 8 specimens designated African/Black (numbers shown in parentheses) were omitted from analysis. Data were analyzed with a two-tailed  $\chi^2$  with Fischer's exact test. OR = Odds ratio (Baptista-Pike), CI = 95% confidence interval, CD = Crohn's disease, UC = ulcerative colitis, AF = allele frequency.

|               | <b>Location:<br/>Chromosome<br/>1q23.3;<br/>GRCh38:<br/>CM000663.2<br/>(Forward strand)</b> | <b>Consequence</b>  | <b>Global<br/>Freq.</b> | <b>EUR SP<br/>Freq.</b> | <b>r<sup>2</sup>:<br/>rs2274907</b> | <b>LD<br/>(r<sup>2</sup> &gt; 0.1)</b> | <b>Allele correlated with<br/>rs2274907 (T)</b> |
|---------------|---------------------------------------------------------------------------------------------|---------------------|-------------------------|-------------------------|-------------------------------------|----------------------------------------|-------------------------------------------------|
| <b>CD244</b>  |                                                                                             |                     |                         |                         |                                     |                                        |                                                 |
| GWAS-Catalog  |                                                                                             |                     |                         |                         |                                     |                                        |                                                 |
| rs4656940     | 1:160860478                                                                                 | A/G (intronic)      | G: 33%                  | G: 19%                  | 0.3646<br>(D' = 0.8487)             | Yes                                    | A                                               |
| rs115868021   | 1:160841584                                                                                 | C/G (A129H)         | G: 0%                   | G: 0%                   | 0.0019                              | No                                     |                                                 |
| rs569911      | 1:160828419                                                                                 | intergenic          | T/C                     | C: 47%                  | 0.0178                              | No                                     |                                                 |
| NCBI-LitVar   |                                                                                             |                     |                         |                         |                                     |                                        |                                                 |
| rs6682654     | 1:160839213                                                                                 | G/A (intronic)      | A: 40%                  | A: 55%                  | 0.0295                              | No                                     |                                                 |
| rs3766379     | 1:160837925                                                                                 | T/C (intronic)      | C: 56%                  | C: 56%                  | 0.0188                              | No                                     |                                                 |
| rs3766377     | 1:160830769                                                                                 | A/G (3' UTR)        | G: 38%                  | G: 26%                  | 0.0996                              | No                                     |                                                 |
| rs3753389     | 1:160837363                                                                                 | T/C (intronic)      | C: 57%                  | C: 45%                  | 0.0192                              | No                                     |                                                 |
| rs4656942     | 1:160861258                                                                                 | G/A (intronic)      | A: 22%                  | A: 25%                  | 0.1023<br>(D' = 0.8029)             | Yes                                    | A                                               |
| rs76030314    | 1:160839020                                                                                 | T/C (V234I)         | C:1%                    | C: 0%                   | N/A                                 | No                                     |                                                 |
| rs485618      | 1:160830690                                                                                 | C/T (3' UTR)        | T: 37%                  | T: 53%                  | 0.0178                              | No                                     |                                                 |
| rs373331921   | 1:160841468                                                                                 | G/A (R133C)         | A: 0%                   | A: 0%                   | N/A                                 | No                                     |                                                 |
| rs754083936   | 1:160834104                                                                                 | T/C (T303A)         | C: 0%                   | C: 0%                   | N/A                                 | No                                     |                                                 |
| rs11265498    | 1:160858495                                                                                 | C/T (intronic)      | T: 45%                  | T: 20%                  | 0.3786<br>(D' = 0.8409)             | Yes                                    | C                                               |
| rs749910003   | 1:160838965                                                                                 | C/T (R155K)         | T: 0%                   | T: 0%                   | N/A                                 | No                                     |                                                 |
| <b>LY9</b>    |                                                                                             |                     |                         |                         |                                     |                                        |                                                 |
| GWAS-Catalog  |                                                                                             |                     |                         |                         |                                     |                                        |                                                 |
| rs540254      | 1:160797947                                                                                 | C/T (intronic)      | T: 66%                  | T: 63%                  | 0.1722<br>(D' = 0.7776)             | Yes                                    | C                                               |
| rs3817407     | 1:160818341                                                                                 | T/C (intronic)      | C: 36%                  | C: 42%                  | 0.0927                              | No                                     |                                                 |
| rs494091      | 1:160822102                                                                                 | T/C (intronic)      | C: 63%                  | C: 45%                  | 0.0217                              | No                                     |                                                 |
| rs571841      | 1:160821621                                                                                 | C/T (intronic)      | T: 63%                  | T: 45%                  | 0.0209                              | No                                     |                                                 |
| rs12128261    | 1:160792994                                                                                 | T/G (intergenic)    | G: 20%                  | G: 23%                  | 0.0962                              | No                                     |                                                 |
| NCBI-LitVar   |                                                                                             |                     |                         |                         |                                     |                                        |                                                 |
| rs509749      | 1:160823770                                                                                 | A/G (V602M)         | G: 66%                  | G: 45%                  | 0.0225                              | No                                     |                                                 |
| rs560681      | 1:160816880                                                                                 | A/G (intronic)      | G: 34%                  | G: 28%                  | 0.1275<br>(D' = 0.3973)             | Yes                                    | A                                               |
| rs512645      | 1:160828336                                                                                 | A/G (Reg.)          | G: 57%                  | G: 47%                  | 0.0171                              | No                                     |                                                 |
| rs145664274   | 1:160818307                                                                                 | C/T (Stop)          | T: 0%                   | T: 0%                   | N/A                                 | No                                     |                                                 |
| <b>SLAMF7</b> |                                                                                             |                     |                         |                         |                                     |                                        |                                                 |
| GWAS-Catalog  |                                                                                             |                     |                         |                         |                                     |                                        |                                                 |
| rs489286      | 1:160752760                                                                                 | A/G (intronic)      | G: 69%                  | G: 68%                  | 0.0123                              | No                                     |                                                 |
| rs35967351    | 1:160742014                                                                                 | A/T (intronic)      | T: 19%                  | T: 30%                  | 0.009                               | No                                     |                                                 |
| rs11581248    | 1:160750284                                                                                 | C/T (intronic)      | T: 4%                   | T: 13%                  | 0.0817                              | No                                     |                                                 |
| rs3766370     | 1:160741687                                                                                 | C/T (intronic)      | T: 19%                  | T: 30%                  | 0.0093                              | No                                     |                                                 |
| rs12068654    | 1:160773959                                                                                 | T/G (intergenic)    | G: 20%                  | G: 30%                  | 0.0063                              | No                                     |                                                 |
| rs983494      | 1:160734175                                                                                 | G/A (Reg. region)   | A: 14%                  | A: 21%                  | 0.004                               | No                                     |                                                 |
| rs184772      | 1:160719355                                                                                 | G/A (intergenic)    | A: 11%                  | A: 3%                   | 0.0019                              | No                                     |                                                 |
| NCBI-LitVar   |                                                                                             |                     |                         |                         |                                     |                                        |                                                 |
| rs372671482   | 1:160749940                                                                                 | G/A (A166T)         | A: 0%                   | A: 0%                   | N/A                                 | No                                     |                                                 |
| rs1232783379  | 1:160739302                                                                                 | A/G (No start)      | G: 0%                   | G: 0%                   | N/A                                 | No                                     |                                                 |
| rs201990333   | 1:160750030                                                                                 | G/A (I62V)          | A: 0%                   | A: 0%                   | N/A                                 | No                                     |                                                 |
| rs1418193833  | 1:160750012                                                                                 | G/T (D83Y)          | N/A                     | N/A                     | N/A                                 | No                                     |                                                 |
| rs570311439   | 1:160752200                                                                                 | G/A (R115G)         | A: 0%                   | A: 0%                   | 0.005                               | No                                     |                                                 |
| rs2295616     | 1:160740367                                                                                 | G/A (intronic)      | A: 19%                  | A: 30%                  | 0.0087                              | No                                     |                                                 |
| rs758817538   | 1:160748217                                                                                 | A/G (K27E)          | G: 0%                   | G: 0%                   | N/A                                 | No                                     |                                                 |
| rs117009784   | 1:160750053                                                                                 | A/C (R96S)          | C: 2%                   | C: 0%                   | 0.0105                              | No                                     |                                                 |
| rs768547449   | 1:160750417                                                                                 | C/T (Stop)          | N/A                     | N/A                     | N/A                                 | No                                     |                                                 |
| rs1364368414  | 1:160749822                                                                                 | G/A (Splice region) | N/A                     | N/A                     | N/A                                 | No                                     |                                                 |
| rs201003538   | 1:160748247                                                                                 | G/A (V37M)          | A: 0%                   | A: 0%                   | 0.0005                              | No                                     |                                                 |
| rs1201685692  | 1:160752211                                                                                 | C/T (A206V)         | N/A                     | N/A                     | N/A                                 | No                                     |                                                 |
| rs369009453   | 1:160739338                                                                                 | A/G (I13V)          | G: 0%                   | G: 0%                   | N/A                                 | No                                     |                                                 |
| rs1287027241  | 1:160749955                                                                                 | G/C (P171A)         | C: 0%                   | C: 0%                   | N/A                                 | No                                     |                                                 |
| rs1241870933  | 1:160750311                                                                                 | T/C (A219A)         | N/A                     | N/A                     | N/A                                 | No                                     |                                                 |
| rs1440777816  | 1:160751358                                                                                 | G/C (E154D)         | C: 0%                   | C: 0%                   | N/A                                 | No                                     |                                                 |

|              |             |                |        |        |        |    |  |
|--------------|-------------|----------------|--------|--------|--------|----|--|
| rs755459128  | 1:160750102 | C/G (L113V)    | G: 0%  | G: 0%  | N/A    | No |  |
| rs1320318509 | 1:160751363 | A/G (R263K)    | G: 0%  | G: 0%  | N/A    | No |  |
| rs1209352977 | 1:160748422 | T/C (L95P)     | C: 0%  | C: 0%  | N/A    | No |  |
| rs767632168  | 1:160752226 | C/G (C158S)    | G: 0%  | G: 0%  | N/A    | No |  |
| rs978935748  | 1:160750306 | G/A (A218T)    | A: 0%  | A: 0%  | N/A    | No |  |
| rs757706994  | 1:160739316 | A/C (P5P)      | N/A    | N/A    | N/A    | No |  |
| rs17313034   | 1:160744058 | T/C (intronic) | C: 15% | C: 29% | 0.0071 | No |  |
| rs1314509893 | 1:160749863 | A/G (N140S)    | G: 0%  | G: 0%  | N/A    | No |  |
| rs141021747  | 1:160749994 | T/A (W184R)    | A: 0%  | A: 0%  | N/A    | No |  |
| rs1360254115 | 1:160749874 | A/G (T144A)    | N/A    | N/A    | N/A    | No |  |
| rs1238369872 | 1:160749961 | G/A (E173K)    | A: 0%  | A: 0%  | N/A    | No |  |
| rs576161510  | 1:160753131 | C/T (T214M)    | T: 0%  | T: 0%  | N/A    | No |  |
| rs1468582809 | 1:160750022 | T/G (F193C)    | N/A    | N/A    | N/A    | No |  |

**Supplemental Table 2:** Analysis of linkage disequilibrium on Chromosome 1 centromeric to *ITLN1*. Annotated SNPs 3' to *ITLN1* of *CD244*, *LY9*, and *SLAMF7* queried using the NHGRI-EBI GWAS catalog and NCBI-LitVar databases. Linkage disequilibrium (LD) to *ITLN1* rs2274907 (C/T: V109D) was calculated using the LDpair Tool of the NIH-LDlink software, which references the 1000 Genomes Project (Phase 3) superpopulation (SP) data. An  $r^2$  value of  $> 0.1$  for correlated alleles was used as a threshold for LD, as suggested by LDpair (yellow highlight). The Ensembl database was utilized to determine allele frequencies for each SNP in global and European SP as well as regional consequences (e.g., nucleotide changes). Where noted, missense variants and putative functional changes (e.g., regulatory region) are indicated. The IBD-GWAS variant in intron 1 of *CD244* (rs4656940: A/G) is highlighted in red. No additional variants in *CD244*, *LY9*, or *SLAMF7* have been identified by GWAS in relation to IBD or specifically Crohn's disease [31-35].

| Expression quantitative trait locus (eQTL) (Whole Blood) | rs4656940 (A/G)            | rs11265501 (G/A)          | rs12058717 (C/T) | rs11578770 (C/T) | rs4656953 (C/T)            | rs1333062 (T/G)         | rs2274907 (A/T)            | rs2274908 (G/A)            | rs2274910 (T/C)            | rs2297559 (G/A)            | rs4656958 (A/G)       |
|----------------------------------------------------------|----------------------------|---------------------------|------------------|------------------|----------------------------|-------------------------|----------------------------|----------------------------|----------------------------|----------------------------|-----------------------|
| <i>ITLN1</i>                                             | N/A                        | N/A                       | N/A              | N/A              | N/A                        | NES: 0.15<br>(0.000043) | NES: 0.15<br>(0.000053)    | NES: 0.15<br>(0.000062)    | N/A                        | NES: 0.21<br>(8.7e-8)      | NES: 0.21<br>(4.8e-8) |
| <i>CD244</i>                                             | NES: 0.15<br>(4.4e-15)     | N/A                       | N/A              | N/A              | NES:<br>-0.11<br>(7.3e-11) | NES: -0.11<br>(1.8e-11) | NES:<br>-0.11<br>(1.7e-11) | NES:<br>-0.11<br>(1.1e-11) | NES:<br>-0.11<br>(6.9e-11) | NES:<br>-0.094<br>(1.7e-8) |                       |
| Splicing quantitative trait locus (sQTL) (Whole Blood)   | rs4656940 (A/G)            | rs11265501 (G/A)          | rs12058717 (C/T) | rs11578770 (C/T) | rs4656953 (C/T)            | rs1333062 (T/G)         | rs2274907 (A/T)            | rs2274908 (G/A)            | rs2274910 (T/C)            | rs2297559 (G/A)            | rs4656958 (A/G)       |
| <i>LY9</i>                                               | NES:<br>-0.43<br>(1.2e-14) | NES: -0.41<br>(1.6e-14)   | N/A              | N/A              | N/A                        | N/A                     | N/A                        | N/A                        | N/A                        | N/A                        | N/A                   |
| <i>USF1</i>                                              | NES:<br>-0.39<br>(4.4e-8)  | NES:<br>-0.35<br>(2.8e-7) | N/A              | N/A              | NES: 0.35<br>(2.6e-9)      | NES: 0.34<br>(9.5e-9)   | NES: 0.35<br>(4.4e-9)      | NES: 0.35<br>(3.9e-9)      | NES: 0.36<br>(1.2e-9)      | NES: 0.37<br>(9.9e-10)     | NES: 0.37<br>(1.0e-9) |

**Supplementary Table 3.** Quantitative trait loci (QTL) analysis of whole blood using SNPs at the *ITLN1* locus identified by the NHGRI-EBI GWAS Catalog and NCBI-LitVar. The Genotype-Tissue Expression (GTEx) Portal was queried using eleven SNPs at the *ITLN1* locus for expression QTLs (eQTLs) and splicing QTLs (sQTLs), which identified data entries for *ITLN1*, *CD244*, *LY9*, and *USF1*. The normalized effect size (NES) and associated p-values are indicated, unless not available (N/A). No significant data was generated for small intestine or colon QTLs from any SNP queries. No cell-type interaction eQTLs (ieQTLs) or cell-type interaction sQTLs (isQTLs) were identified by any SNP entry. The NES values reflect the variant allele (forward strand, as indicated in row 1).
